# Supplementary material for: Endothelial function is impaired in conduit arteries of pannexin1 knockout mice
Source: PubMed Central journal article supplement (PMC4046076; doi:10.1186/1745-6150-9-8), 2014-05-17
Supplement: 1745-6150-9-8-S1.pdf [file 1745-6150-9-8-S1.pdf]

Additional file 1: Figure S1.

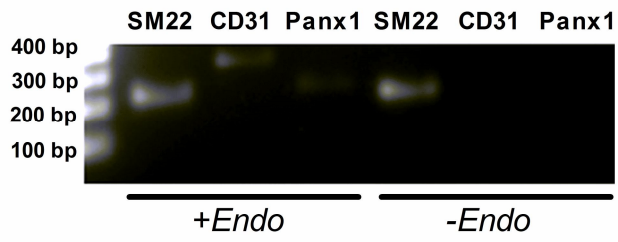

RT-PCR products for smooth muscle cells marker SM22, endothelial cell marker CD31 and Panx1 in endothelium-intact (+*Endo*) and endothelium-denuded (-*Endo*) arteries.
