# Supplementary material for: Endothelial function is impaired in conduit arteries of pannexin1 knockout mice
Source: PubMed Central journal article supplement (PMC4046076; doi:10.1186/1745-6150-9-8), 2014-05-17
Supplement: 1745-6150-9-8-S2.pdf [file 1745-6150-9-8-S2.pdf]

Additional file 2: Figure S2.

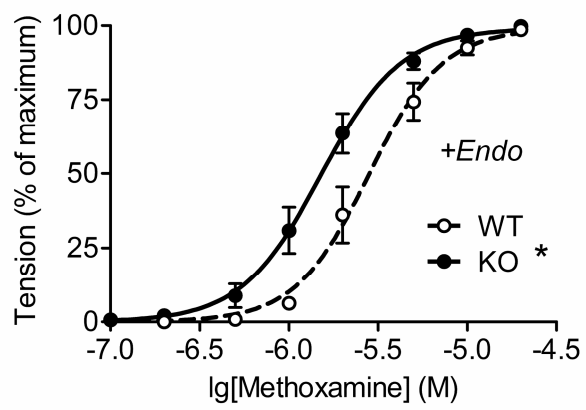

Concentration-response relationships of *endothelium-intact* saphenous arteries from WT and  $Panx1^{-/-}$  mice to methoxamine (n=7; 10, \*p<0.05).
